RESEARCH ARTICLE

# Identification of novel genetic loci for osteoporosis and/or rheumatoid arthritis using cFDR approach

Rou Zhou<sup>1</sup>, Xu Lin<sup>1</sup>, Ding-You Li<sup>2</sup>, Xia-Fang Wang<sup>1</sup>, Jonathan Greenbaum<sup>3</sup>, Yuan-Cheng Chen<sup>1</sup>, Chun-Ping Zeng<sup>1</sup>, Jun-Min Lu<sup>1</sup>, Zeng-Xing Ao<sup>1</sup>, Lin-Ping Peng<sup>1</sup>, Xiao Chun Bai<sup>1</sup>, Jie Shen<sup>1</sup>, Hong-Wen Deng<sup>1,3\*</sup>

**1** Department of Endocrinology and Metabolism, The Third Affiliated Hospital of Southern Medical University, Guangzhou, PR China, **2** Department of Gastroenterology, Children's Mercy Kansas City, University of Missouri Kansas City School of Medicine, Kansas City, MO, United States of America, **3** Center for Bioinformatics and Genomics, Department of Biostatistics and Bioinformatics, Tulane University, New Orleans, LA, United States of America

\* [hdeng2@tulane.edu](mailto:hdeng2@tulane.edu)

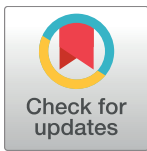

**OPEN ACCESS**

**Citation:** Zhou R, Lin X, Li D-Y, Wang X-F, Greenbaum J, Chen Y-C, et al. (2017) Identification of novel genetic loci for osteoporosis and/or rheumatoid arthritis using cFDR approach. PLoS ONE 12(8): e0183842. <https://doi.org/10.1371/journal.pone.0183842>

**Editor:** Zhi Wei, New Jersey Institute of Technology, UNITED STATES

**Received:** March 21, 2017

**Accepted:** August 12, 2017

**Published:** August 30, 2017

**Copyright:** © 2017 Zhou et al. This is an open access article distributed under the terms of the [Creative Commons Attribution License](https://creativecommons.org/licenses/by/4.0/), which permits unrestricted use, distribution, and reproduction in any medium, provided the original author and source are credited.

**Data Availability Statement:** 1.FNK BMD GWAS summary statistics from the Genetic Factors for OP (GEFOS) Consortium whose authors may be contacted at (<http://www.gefos.org/?q=content/data-release-2015>) 2.RA GWAS summary statistics from the public accessible datasets whose authors may be contacted at (<http://plaza.umin.ac.jp/~yokada/datasource/software.htm>).

**Funding:** This work was supported by the NIH (Grant Number: P50AR055081, R01AR057049, R01AR059781, D43TW009107, P20 GM109036,

## Abstract

There are co-morbidity between osteoporosis (OP) and rheumatoid arthritis (RA). Some genetic risk factors have been identified for these two phenotypes respectively in previous research; however, they accounted for only a small portion of the underlying total genetic variances. Here, we sought to identify additional common genetic loci associated with OP and/or RA. The conditional false discovery rate (cFDR) approach allows detection of additional genetic factors (those respective ones as well as common pleiotropic ones) for the two associated phenotypes. We collected and analyzed summary statistics provided by large, multi-center GWAS studies of FNK (femoral neck) BMD (a major risk factor for osteoporosis) ( $n = 53,236$ ) and RA ( $n = 80,799$ ). The conditional quantile-quantile (Q-Q) plots can assess the enrichment of SNPs related to FNK BMD and RA, respectively. Furthermore, we identified shared loci between FNK BMD and RA using conjunction cFDR (ccFDR). We found strong enrichment of p-values in FNK BMD when conditional Q-Q was done on RA and *vice versa*. We identified 30 novel OP-RA associated pleiotropic loci that have not been reported in previous OP or RA GWAS, 18 of which located in the MHC (major histocompatibility complex) region previously reported to play an important role in immune system and bone health. We identified some specific novel polygenic factors for OP and RA respectively, and identified 30 novel OP-RA associated pleiotropic loci. These discovery findings may offer novel pathobiological insights, and suggest new targets and pathways for drug development in OP and RA patients.

## Introduction

Osteoporosis (OP) is a major public health problem, affecting millions of people worldwide, particularly postmenopausal women. In the United States, the prevalence of OP is estimated to

R01MH107354, R01MH104680, R01GM109068). The funder had no role in study design, data collection and analysis, decision to publish, or preparation of the manuscript.

**Competing interests:** The authors have declared that no competing interests exist.

be greater than 14 million people in 2020 [1]. In China, the population with OP is expected to reach 212 million people by the year 2050 [2]. OP is characterized by low bone mass and micro-architectural deterioration of bone tissue, leading to increased bone fragility and increased susceptibility to fracture [3]. Bone mineral density (BMD) measurement is currently the standard major method for the diagnosis OP and fracture prediction. OP is a polygenetic disorder with a BMD heritability estimated between 50% and 80% [4].

Rheumatoid arthritis (RA) is an autoimmune inflammatory disease affecting approximately 0.5–1% of the world population. RA is characterized by symmetric joint swelling, tenderness and destruction of synovial joints, eventually leading to severe joint destruction and disability [5]. In US, RA affects 1.3 million adults [6]. In China, it is estimated that 0.32%–0.36% people suffer from RA [7]. It is widely recognized that RA is closely associated with both genetic and environmental factors. Twin studies showed that the heritability of RA is about 60% [8].

RA is frequently associated with OP, which may occur in 60–80% of RA patients [9]. In RA, bone is a target of inflammation, which leads to systemic OP, periarticular osteopenia and bone erosion, resulting in dramatically increased risks of fractures and related morbidity, mortality, and healthcare costs. Several cross-sectional studies have shown that a lower BMD was associated with increase risk in OP in patients with RA compared to matched controls [10, 11].

OP is a multifactorial condition, especially in patients with RA. Many studies have demonstrated that OP are closely related to proinflammatory cytokines, such as TNF- $\alpha$ , IL-1, IL-6 and IL-17, which have been shown to be vital in bone resorption [12]. Genetic and environmental factors both contribute to RA-associated OP, and genetic background plays an important role. However, genetic risk factors have not been well defined in RA-associated OP. Research for genetic factors has been focused on screening for polymorphisms in inflammatory cytokine genes and OP candidate genes, such as *VDR* gene and *OPG* gene, to identify shared genes between OP and RA. Current findings accounted for only a small portion of the underlying total genetic variances for OP and RA. In addition, reported results from different studies were largely in disagreement [13–16]. Hence, it is necessary to systematically identify additional common genetic loci associated with OP and RA using a different and new approach.

The conditional false discovery rate (cFDR) is a method recently developed by Andreassen et al. [17], and is powerful for genome-wide association studies (GWAS) analysis using summary statistics. Andreassen et al. has effectively applied and identified previously unsuspected common genetic risk loci for complex diseases, e.g., schizophrenia and cardiovascular disease traits [18], schizophrenia and bipolar disorder [17]. The principle of this method is to test variants for association with the principal phenotype conditional on different strengths of association with a second trait via combining the summary statistics from two different and independent GWAS of two related study traits [17]. We have applied the method and successfully identified some interesting shared genetic risk loci for common complex diseases, e.g., height and FNK BMD [19], Type 2 Diabetes and birth weight [20], Coronary artery disease and BMD [21]. To date, many GWAS for OP and RA have been performed separately and identified multiple genetic risk loci associated with them respectively. The cFDR method can efficiently increase the effective sample size for GWAS analysis of those pleiotropic loci based on existing GWAS data (summary statistics) of two related traits/diseases, hence no need to increase the original GWAS sample sizes with additional sample and data. In this study, we analyzed two large publically accessible GWAS datasets to identify common genetic loci for OP and RA using this new and powerful cFDR method.

## Materials and methods

### GWAS datasets

We acquired two GWAS summary statistics from publically accessible datasets. The first dataset is the association analysis with RA coming from a GWAS meta-analysis of 80,799 subjects (European & Asian) carried out by Okada et al. [22], and we chose European-specific results with 58,284 subjects for this study, to ensure consistency of ethnicity with those used with the following study of OP. This was a meta-analysis that was obtained from 18 studies from Europe to assess European-specific association between RA and more than 8 million genotyped or imputed single-nucleotide polymorphisms (SNPs). The data included summary statistics, which provided the p-values showing association and effect of orientation for each variant after controlling for genomic inflation (due to potential population sub-structure) at both the individual study level and the meta-analysis.

The 2nd dataset is the FNK BMD coming from a GWAS meta-analysis with 33 individual studies, which involved 32,735 European subjects and was performed by the Genetic Factors for OP (GEFOS) Consortium [23]. The dataset provided summary statistics for the associations of the FNK BMD and more than 10 million genotyped and imputed SNPs.

The above two GWAS datasets are independent with no overlapping individuals.

### Data preparation

Firstly, we annotated and mapped SNPs from the two GWAS studies to genes, and combined the summary statistics from the two GWAS studies for the 5,806,739 SNPs that were common in the two studies. Next, in order to generate SNPs being in approximate linkage equilibrium with each other, we applied a linkage disequilibrium (LD) based pruning method in Plink version 19.0 [24]. The pruning process of the dataset used the CEU HapMap 3 genotype and LD information. The pruning algorithm proceeded with a window of 20 SNPs, in which LD between each pair of SNPs was assessed, and if the LD was greater than 0.2 then one of the pair of SNPs was removed. The LD threshold of 0.2 was consistent with other using the cFDR method papers. For the pairs with the LD greater than 0.2, we adopted minor allele frequency (MAF) pruning method and removed the SNP of the smaller MAF. After this initial removal of SNPs, the window shifted 5 SNPs forward, and repeated the procedure until no pairs of SNPs being in high LD. Finally, there were 176,331 SNPs remained to be used in the analysis after pruning.

In order to ensure that the genetic variance estimates from each SNP are not inflated owing to population structure, adjustment of GWAS results with genomic control is necessary. Because the authors from the two original GWAS datasets had previously applied genomic control rigorously, there was no need to apply this adjustment again in this study.

### Statistical analysis

The concept of the cFDR extends from the unconditional false discovery rate (uFDR), which is defined as the probability of a false positive association for a set of variants in the single phenotype case [25]. Similarly, the cFDR applies this idea to the two related phenotype case and is characterized as the probability that a given SNP has a false positive association with the principal phenotype given that the p-values for both the principal and conditional phenotypes are less than or equal to the observed p-values.

$$cFDR(p_i|p_j) = \Pr(H_0^{(i)}|P_i \leq p_i, P_j \leq p_j) \quad (1)$$

where the observed strength of association that a given SNP is associated with the principal

phenotype is expressed as  $p_i$ , and the observed significance level that the same SNP is associated with the conditional phenotype is expressed as  $p_j$ . The  $H_0^{(i)}$  represents the null hypothesis that a given SNP is not associated with the principal trait [19].

According to the steps outlined by Andreassen *et al.* [17], we computed the cFDR for each variant when FNK BMD is the principal phenotype conditioned on strength of association with RA (FNK BMD | RA) as well as the reverse (RA | FNK BMD). In order to confirm if the cFDR method leads to the enrichment of associated SNPs, we consecutively restricted the subset of SNPs that were tested based on the level of significance for the correlation of each variant with the conditional trait applying the following criteria for  $P_j \leq p_j$ , such as  $P_j \leq 1$  (all SNPs),  $P_j \leq 0.1$ ,  $P_j \leq 0.01$ ,  $P_j \leq 0.001$ . SNPs with the cFDR value smaller than 0.05 were regarded to be significantly related to the principal phenotype.

In order to evaluate the enrichment of association in comparison with that expected under the null hypothesis, we drew conditional quantile-quantile (Q-Q) plots based on changing levels of significance in the conditional trait. The Q-Q plot shows a graph with the observed distribution of p-values plotted versus the expected distribution of p-values under the null. The y-axis represent the nominal p-values ( $-\log_{10}(p)$ ) and the x-axis represent the empirical quantiles ( $-\log_{10}(q)$ ). The degree of leftward shift from the expected null line intuitively shows pleiotropic enrichment.

Conditional Manhattan plots were used to display the independent loci associated with RA, given their association with FNK BMD as well as the reverse. All the SNPs after pruning within an LD block and their chromosomal location in the genome are shown in these plots. When  $-\log_{10}(p)$  value is greater than 1.3, the variant was considered to be significantly associated with the principal phenotype considering the association of that variant with the conditional phenotype.

To identify loci that are associated with both FNK BMD and RA, we computed the conjunction cFDR (ccFDR) value after computing the cFDR(FNK BMD | RA) as well as the reverse cFDR(RA | FNK BMD). The ccFDR is characterized as the probability that a given SNP has a false positive association with both the principal and conditional phenotypes. The maximum cFDR value of the two cFDR values is selected as the ccFDR [17].

All SNPs with a ccFDR value smaller than 0.05 were determined to be significantly associated with both traits. In order to show the locations of pleiotropic genetic variants, we presented a conjunction Manhattan plot.

## Functional term enrichment analysis

We performed functional term enrichment analyses using the GO terms database [26] and evaluated the potential functions of the trait associated loci identified by cFDR and pleiotropic loci identified by ccFDR. We then classified trait-associated loci according to their known biological processes and molecular functions. This bioinformatic analysis is intended to partially assess the validity and functional relevance of our findings by identifying gene sets that are significantly related to bone metabolism and/or RA processes.

## Results

### Assessment of pleiotropic enrichment

Conditional Q-Q plots are used to visualize the distribution of p-values and assess the pleiotropic enrichment. The distribution of p-values follows the null distribution diagonal line under the null hypothesis. The enrichment of genetic association would appear to deflect leftwards from the null line because the association of principal phenotype depends on the more

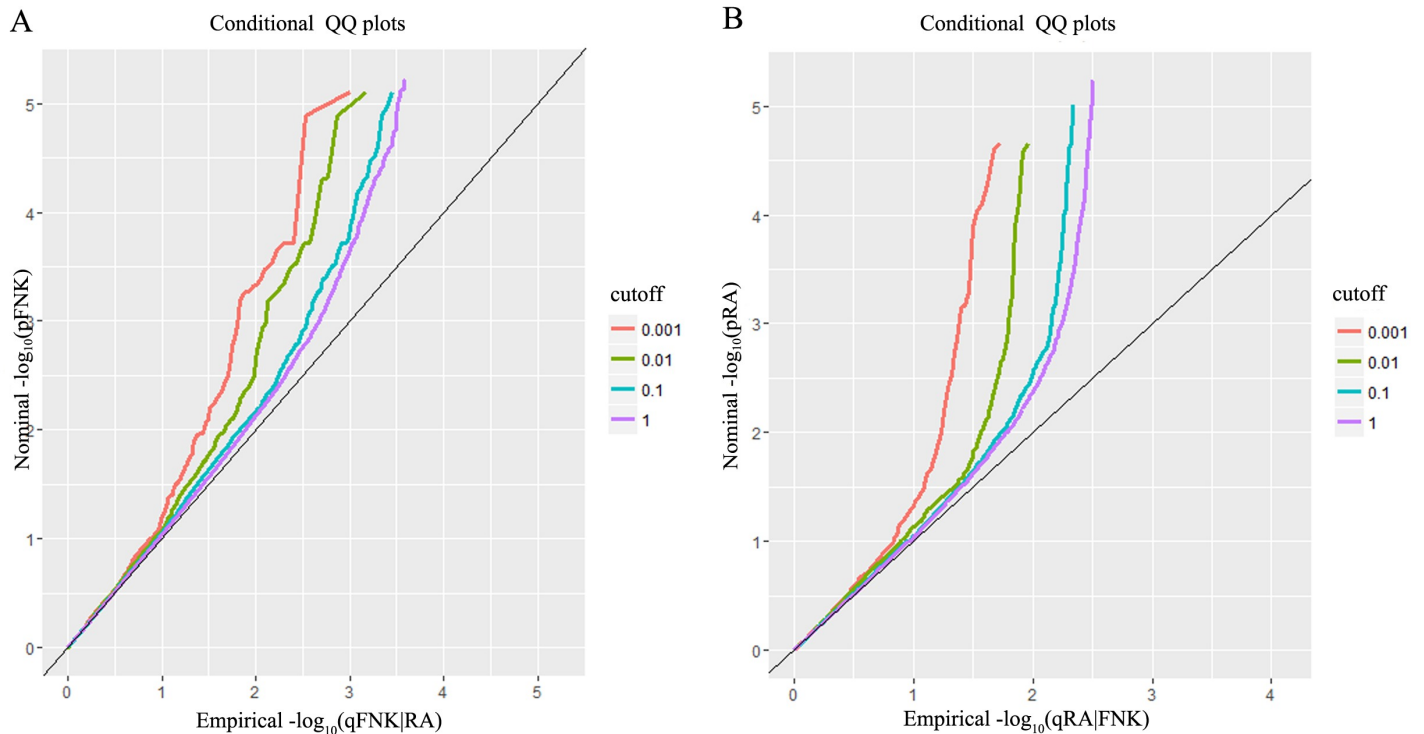

**Fig 1. Conditional QQ plots.** Conditional QQ plots of nominal versus empirical  $-\log_{10}$  p-values for (A) FNK BMD as a function of significance of the association with RA, and (B) RA as a function of significance of the association with FNK BMD. The diagonal line represents the null hypothesis.

<https://doi.org/10.1371/journal.pone.0183842.g001>

stringent association criteria of the conditional phenotype. The larger the interval between the conditions Q-Q plots, the greater the degree of pleiotropic-effect of the genes shared between the two traits.

The conditional Q-Q plot of the FNK BMD giving nominal p-values associated with RA (Fig 1A) reveals some enrichment at the different significance thresholds of RA. The presence of leftward shift indicates that the number of true associations for a given RA p-value increase when the analysis is limited to include SNPs of more significant associations. From the conditional Q-Q plot for RA given FNK BMD (Fig 1B), we can observe a larger separation between the different curves, which indicate that there may be a stronger enrichment for RA (given FNK BMD) than that for FNK BMD (given RA).

### FNK BMD loci identified with cFDR

We identified a total of 88 significant SNPs (cFDR < 0.05) for FNK BMD variation associated with RA (Fig 2A), which were located on 16 different chromosomes. Of the 88 SNPs, 53 had p-values smaller than  $1 \times 10^{-5}$  and 18 reached genome-wide significance at  $5 \times 10^{-8}$  in the original meta-analysis for FNK BMD [23]. There are four SNPs among the eighteen SNPs—rs7554551 [27], rs6710518 [28], rs1038304 [29], rs228768 [30], that were previously reported/identified to be associated with BMD or OP, and the other fourteen were not found reported/identified in earlier studies. Furthermore, these 88 variants identified to be associated with FNK BMD are enriched in several skeletal metabolism related functional terms (Table 1), such as “positive regulation of bone mineralization”, “negative regulation of ossification”, “osteoblast development”, “positive regulation of chondrocyte differentiation”, and “negative regulation of canonical Wnt signaling pathway”.

## RA gene loci identified with cFDR

We identified a total of 778 significant SNPs (cFDR < 0.05) for RA variation associated with FNK BMD (Fig 2B), which were located on 22 different chromosomes. Of the 778 SNPs identified, 567 had p-values smaller than  $1 \times 10^{-5}$  and 437 reached genome-wide significance at  $5 \times 10^{-8}$  in the original meta-analysis for RA [22].

In order to carry out the functional term enrichment analysis for these results, we chose 633 variants with cFDR < 0.01 for analysis. The results shown a large number of RA loci were enriched in several immune system related functional terms (Table 1), such as “immune response”, “antigen processing and presentation”, “T cell costimulation”, “positive/negative regulation of T cell proliferation”, “negative regulation of tumor necrosis factor production”, “negative regulation of inflammatory response”, “innate immune response”, and “regulation of immune response”.

## Pleiotropic gene loci for both FNK BMD and RA

We applied the ccFDR value to identify genetic loci associated with both FNK BMD and RA. The ccFDR is characterized as the probability that a given SNP has a false positive association with both the principal and conditional phenotypes. Furthermore, we constructed the ccFDR Manhattan plot (Fig 2C) to graphically show the distribution of the pleiotropic loci identified with the two traits. We identified 30 independent pleiotropic loci significantly (ccFDR < 0.05) associated with both traits (Table 2). 18 of the 30 variants were located within the region of the major histocompatibility complex (MHC), which is a genomic region located at 6p21.3 and is essential in the control of the immune system [31], and is previously confirmed to be associated with RA [32] and OP [33]. Of the 18 SNPs, 13 SNPs were located within the class III region of the MHC—rs9378164 (*LY6G5C*), rs1266071 (*BAT5*), rs2734335 (*C2*), rs401775 (*SKIV2L*), rs6909427, rs547261, rs9368716, rs1265762, rs2073046 (*C6orf10*), rs3115576, rs9268055, rs2395114 and rs4713518 (*NOTCH4* and *C6orf10*), and other 5 SNPs were located within the class II region of the MHC—rs35571244 and rs35599935 (*PPP1R2P1* and *HLA-DMB*), rs34043227 (*HLA-DQB2* and *HLA-DOB*), rs3101944 (*HLA-DMB* and *HLA-DMA*), and rs1367727 (*HLA-DMA* and *BRD2*). Twelve other variants of the 30 identified pleiotropic variants are located on 6 different chromosomes: seven variants ((rs17016749 (*INPP4B*), rs2880389 (*BOLL* and *PLCL1*), rs1318867 and rs11684176 (*PLCL1*), rs11066320 (*PTPN11*), rs1109241 (*ETS1* and *FLII*), and rs9469623

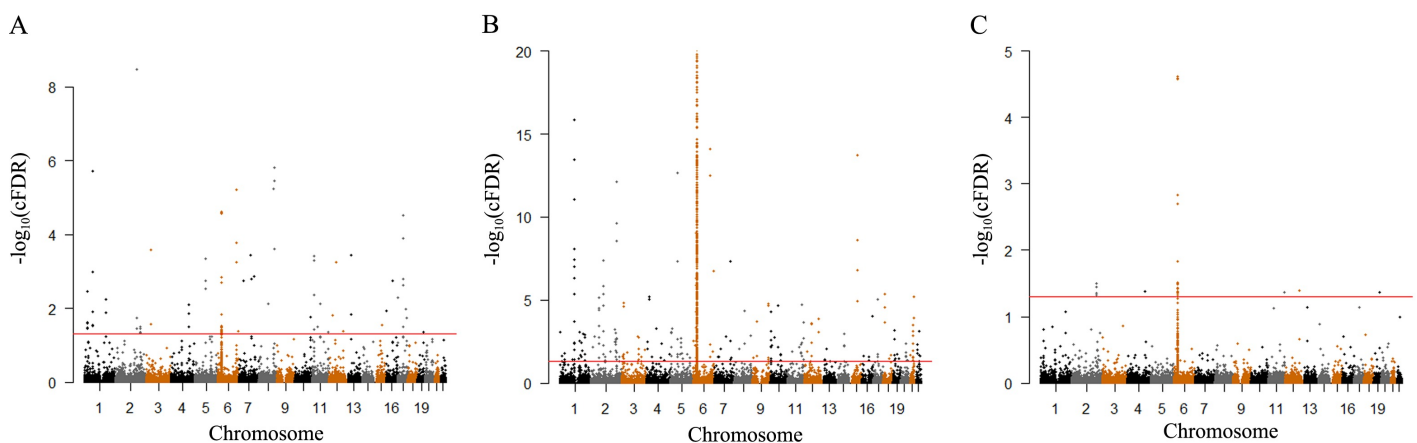

**Fig 2.** A) “Conditional Manhattan plot” of conditional  $-\log_{10}$  FDR values for FNK BMD given RA (FNK BMD|RA); B) “Conditional Manhattan plot” of conditional  $-\log_{10}$  FDR values for RA given FNK BMD (RA|FNK BMD); C) “Conjunction Manhattan plot” of conjunction  $-\log_{10}$  FDR values for FNK BMD and RA. SNPs with conditional  $-\log_{10}$  FDR > 1.3 (i.e. FDR < 0.05) are shown above the red line.

<https://doi.org/10.1371/journal.pone.0183842.g002>

**Table 1. Functional term enrichment analysis.**

| GO Term                                                 | Total size of pathway genes | Gene Count | P-value  | Specific gene names                     | Benjamini |
|---------------------------------------------------------|-----------------------------|------------|----------|-----------------------------------------|-----------|
| <b>FNK BMD loci</b>                                     |                             |            |          |                                         |           |
| Positive regulation of bone mineralization              | 35                          | 3          | 0.0395   | <i>MEF2C, WNT4, SMAD3</i>               | 0.2881    |
| Negative regulation of ossification                     | 16                          | 2          | 0.0263   | <i>MEF2C, SOST</i>                      | 0.7617    |
| Osteoblast development                                  | 17                          | 2          | 0.0263   | <i>PTHLH, SMAD3</i>                     | 0.7639    |
| Positive regulation of chondrocyte differentiation      | 19                          | 2          | 0.0497   | <i>SMAD3, SOX6</i>                      | 0.7841    |
| Negative regulation of canonical Wnt signaling pathway  | 163                         | 3          | 0.0395   | <i>WNT4, SOST, PARK2</i>                | 0.8284    |
| <b>RA loci</b>                                          |                             |            |          |                                         |           |
| Antigen processing and presentation                     | 55                          | 18         | 1.38E-20 | <i>HLA-DMB</i>                          | 8.52E-18  |
| Immune response                                         | 421                         | 32         | 4.59E-17 | <i>HLA-DQB2, HLA-DMA, HLA-DOB, ETS1</i> | 1.42E-14  |
| T cell costimulation                                    | 78                          | 12         | 9.89E-10 | <i>HLA-DQB2, PTPN11</i>                 | 1.75E-07  |
| Positive regulation of T cell proliferation             | 60                          | 7          | 5.35E-05 | <i>HLA-DMB</i>                          | 0.0050    |
| Negative regulation of T cell proliferation             | 37                          | 5          | 7.38E-04 | <i>IL2RA, HLA-DRB1, CTLA4</i>           | 0.0495    |
| Regulation of immune response                           | 178                         | 10         | 1.74E-04 | <i>MICA, ICAM3, NCR3</i>                | 0.0143    |
| Negative regulation of tumor necrosis factor production | 38                          | 4          | 8.61E-03 | <i>PTPN22, TNFAIP3, NFKBIL1</i>         | 0.3276    |
| Negative regulation of inflammatory response            | 79                          | 5          | 1.17E-02 | <i>IL2RA, PTPN2, ETS1, TNFAIP3</i>      | 0.3952    |
| Innate immune response                                  | 430                         | 11         | 2.25E-02 | <i>REL, TRIM31, C2,</i>                 | 0.5528    |

Gene ontology enrichment analysis was carried out using David [26], and “P-value<0.05” suggests the term is significantly more enriched than random chance.

<https://doi.org/10.1371/journal.pone.0183842.t001>

(*LOC100132252* and *GRM4*) are located at or close to the genes that are related to RA and other immune associated traits or OP and other bone related traits [22, 34–38], and five variants ((rs13413470 (*RFTN2*), rs7340470 (*RFTN2* and *MARS2*), rs700653 (*BOLL*), rs10947432 (*C6orf125*), and rs2099102 (*EHD2*)) are novel and not related to any of the two diseases or related traits after a thorough literature search (OMIM and PubMed).

## Discussion

In this study, we discovered 88 FNK BMD susceptibility loci, which included 18 loci reached genome-wide significance at  $5 \times 10^{-8}$  in the original meta-analysis for FNK BMD [23]. And we also identified 778 RA susceptibility loci, which included 567 loci reached genome-wide significance at  $5 \times 10^{-8}$  in the original meta-analysis for RA [22]. Most importantly, we reported 30 new OP-RA associated pleiotropic loci that have not been reported in previous OP or RA GWAS. Our study represents the first systematic effort to explore the genetic basis of OP and RA in a large sample set. We identified the pleiotropic effects of variants associated with OP and RA by combining the summary statistics from two different GWAS meta-analyses. Compared with the existing standard single phenotype analysis, synchronous analysis for multiple related traits not only increase discovery of trait-associated variants under original datasets for individual traits, but also provide a new insight to further detect the common genetic mechanisms between associated phenotypes.

**Table 2. Conjunction cFDR: Pleiotropic loci in FNK BMD and RA.**

| SNP        | Chr | Role        | Neighbor Gene            | Raw P-Value |           | cFDR     |           | ccFDR    |
|------------|-----|-------------|--------------------------|-------------|-----------|----------|-----------|----------|
|            |     |             |                          | FNK         | RA        | FNK RA   | RA FNK    |          |
| rs13413470 | 2   | intron      | <i>RFTN2</i>             | 6.58E-04    | 5.10E-04  | 4.39E-02 | 1.17E-02  | 4.39E-02 |
| rs7340470  | 2   | NA          | <i>RFTN2 MARS2</i>       | 5.83E-04    | 9.30E-05  | 3.57E-02 | 2.39E-03  | 3.57E-02 |
| rs700653   | 2   | intron      | <i>BOLL</i>              | 4.75E-04    | 2.20E-05  | 4.76E-02 | 9.31E-04  | 4.76E-02 |
| rs2880389  | 2   | NA          | <i>BOLL PLCL1</i>        | 1.92E-04    | 7.90E-05  | 3.17E-02 | 3.22E-03  | 3.17E-02 |
| rs1318867  | 2   | intron      | <i>PLCL1</i>             | 2.26E-04    | 1.30E-04  | 3.20E-02 | 4.60E-03  | 3.20E-02 |
| rs11684176 | 2   | intron      | <i>PLCL1</i>             | 1.91E-04    | 6.90E-04  | 4.39E-02 | 2.79E-02  | 4.39E-02 |
| rs17016749 | 4   | intron      | <i>INPP4B</i>            | 4.74E-05    | 1.80E-03  | 1.40E-02 | 4.19E-02  | 4.19E-02 |
| rs9378164  | 6   | near-gene-3 | <i>LY6G5C</i>            | 2.96E-04    | 1.20E-08  | 3.05E-02 | 6.06E-07  | 3.05E-02 |
| rs1266071  | 6   | intron      | <i>BAT5</i>              | 6.35E-03    | 1.80E-129 | 3.18E-02 | 3.93E-127 | 3.18E-02 |
| rs2734335  | 6   | near-gene-5 | <i>C2</i>                | 5.52E-03    | 1.90E-122 | 3.31E-02 | 4.22E-120 | 3.31E-02 |
| rs401775   | 6   | intron      | <i>SKIV2L</i>            | 6.06E-03    | 5.30E-89  | 3.86E-02 | 9.63E-87  | 3.86E-02 |
| rs3115576  | 6   | NA          | <i>NOTCH4 C6orf10</i>    | 6.14E-03    | 1.50E-141 | 3.27E-02 | 3.67E-139 | 3.27E-02 |
| rs9268055  | 6   | NA          | <i>NOTCH4 C6orf10</i>    | 1.25E-02    | 1.10E-111 | 3.67E-02 | 2.04E-109 | 3.67E-02 |
| rs2395114  | 6   | NA          | <i>NOTCH4 C6orf10</i>    | 1.29E-05    | 1.00E-250 | 2.58E-05 | 1.87E-249 | 2.58E-05 |
| rs4713518  | 6   | NA          | <i>NOTCH4 C6orf10</i>    | 7.95E-06    | 1.00E-250 | 2.39E-05 | 5.10E-249 | 2.39E-05 |
| rs6909427  | 6   | intron      | <i>C6orf10</i>           | 1.10E-02    | 1.10E-111 | 3.84E-02 | 2.27E-109 | 3.84E-02 |
| rs547261   | 6   | intron      | <i>C6orf10</i>           | 1.11E-03    | 1.00E-250 | 1.47E-03 | 1.01E-248 | 1.47E-03 |
| rs9368716  | 6   | intron      | <i>C6orf10</i>           | 3.30E-04    | 1.30E-167 | 1.98E-03 | 6.92E-166 | 1.98E-03 |
| rs1265762  | 6   | intron      | <i>C6orf10</i>           | 2.24E-03    | 1.10E-117 | 1.46E-02 | 1.24E-115 | 1.46E-02 |
| rs2073046  | 6   | intron      | <i>C6orf10</i>           | 1.07E-05    | 1.00E-250 | 2.68E-05 | 2.75E-249 | 2.68E-05 |
| rs34043227 | 6   | NA          | <i>HLA-DQB2 HLA-DOB</i>  | 1.47E-02    | 2.70E-229 | 4.11E-02 | 1.74E-226 | 4.11E-02 |
| rs35571244 | 6   | NA          | <i>PPP1R2P1 HLA-DMB</i>  | 1.14E-02    | 1.60E-170 | 4.35E-02 | 6.76E-168 | 4.35E-02 |
| rs35599935 | 6   | NA          | <i>PPP1R2P1 HLA-DMB</i>  | 1.09E-02    | 2.40E-180 | 4.34E-02 | 1.18E-177 | 4.34E-02 |
| rs3101944  | 6   | NA          | <i>HLA-DMB HLA-DMA</i>   | 1.22E-02    | 4.60E-137 | 4.47E-02 | 1.39E-134 | 4.47E-02 |
| rs1367727  | 6   | NA          | <i>HLA-DMA BRD2</i>      | 9.27E-03    | 1.10E-134 | 4.50E-02 | 3.34E-132 | 4.50E-02 |
| rs10947432 | 6   | intron      | <i>C6orf125</i>          | 5.29E-04    | 3.00E-06  | 4.69E-02 | 1.33E-04  | 4.69E-02 |
| rs9469623  | 6   | NA          | <i>LOC100132252 GRM4</i> | 4.67E-04    | 7.10E-04  | 4.34E-02 | 1.78E-02  | 4.34E-02 |
| rs1109241  | 11  | NA          | <i>ETS1 FLI1</i>         | 4.02E-04    | 5.20E-05  | 4.29E-02 | 2.03E-03  | 4.29E-02 |
| rs11066320 | 12  | intron      | <i>PTPN11</i>            | 5.32E-04    | 2.50E-05  | 4.06E-02 | 8.34E-04  | 4.06E-02 |
| rs2099102  | 19  | near-gene-5 | <i>EHD2</i>              | 3.07E-04    | 1.40E-03  | 4.30E-02 | 3.59E-02  | 4.30E-02 |

The following abbreviations are used: chr, chromosome; FNK BMD, Femoral neck bone mineral density; RA, Rheumatoid arthritis; cFDR, conditional false discovery rate; and ccFDR, conjunction conditional false discovery rate.

<https://doi.org/10.1371/journal.pone.0183842.t002>

We carried out the pleiotropic analysis using a cFDR approach, which was recently developed by Andreassen et al. [17]. The basic idea of cFDR is that variants are more likely to exert a true effect when the variants have significant effects in both traits. In the original simulation of the cFDR approach, the authors demonstrated that cFDR approach resulted in 15–20 times' increase of the number of non-null SNPs with a local FDR smaller than 0.05, when compared with the uFDR. It's well known that the traditional meta-analysis method can also increase statistical power, but it can only detect loci that have largely or dominantly the same direction of allelic effects on both traits. In contrast, cFDR method can detect loci regardless of their effect directions [39].

In the following, we highlight some of the salient discoveries from this study for their potential significance to OP and/or RA.

### MHC

Among the 30 SNPs associated with both FNK BMD and RA, 18 were located within MHC region, which is the most vital genomic regions associated with RA. Those 18 SNPs are located



at or near the following genes that have been reported to be related to RA: *C6orf10* [40], *NOTCH4* [41], *HLA-DQB2* [42], *HLA-DMB* [43], *HLA-DMA* [43], and *BRD2* [44]. Although we do not find any report about association between these gene and OP or related traits, some other MHC genes have been identified to be associated with OP in previous research [33]. In addition, it was estimated that approximately 40% of the expressed genes in MHC have immune system function [45]. There is increasing evidence of an association between the immune system and bone [46]. The bone remodeling could be influenced by proinflammatory cytokines (eg., IL-1, IL-6, TNF- $\alpha$ , M-CSF, PGE2) primarily through regulating the osteoprotegerin (OPG) / receptor activator of nuclear factor- $\kappa$ B (RANK) / RANK ligand (RANKL) [12].

### *PLCL1*

The two pleiotropic loci (rs1318867, rs11684176) were located in the intron of *PLCL1* (phospholipase C like 1), an OP candidate gene, which was found to be associated with variation in hip bone size [34]. As for the relationship between *PLCL1* and RA, at present, there is no study reported. However, variants of the *PLCL1* gene had been proven to be associated with other autoimmune diseases, such as Crohn's disease (CD) [47], systemic lupus erythematosus (SLE) [35]. Clinically, multiple autoimmune diseases (ADs) can be observed in cluster [48], including families with RA, suggesting some degree of common genetic susceptibility.

### *PTPN11*

The SNP rs11066320 is located in the intronic region of the *PTPN11* (protein tyrosine phosphatase, non-receptor type 11) gene, which encodes Src homology region 2 (SH2)-containing protein tyrosine phosphatase 2 (SHP-2). SHP-2 belongs to the protein tyrosine phosphatase family, which have been involved in regulating intracellular signal transduction initiated via multiple different growth factors and cytokine receptors [49]. A recent GWAS reported that a RA risk locus (dbSNP ID = rs10774624) is related to the *PTPN11* gene, indicating a role for *PTPN11* in RA [22]. Additionally, the *PTPN11* gene is significantly overexpressed in RA fibroblast-like synoviocytes (FLS) compared with osteoarthritis (OA) FLS, suggesting a novel role for SHP-2 in promoting RA FLS invasiveness [50]. On the other hand, SHP-2 acts as a vital role in the RANK/NFATc1 signaling pathway, and regulates osteoclastogenesis and bone mineral homeostasis [51]. Furthermore, SHP-2 has been shown to be important in controlling osteoblast differentiation, proliferation and metabolism [52].

### *ETS1*

The SNP rs1109241 (11p11.12) is located close to the *ETS1* (ETS proto-oncogene 1, transcription factor) and *FLI1* (Fli-1 proto-oncogene) gene, which have been reported to be associated with RA susceptibility [53]. ETS-1 is part of the ETS family of transcription factors, primarily expressed in lymphoid cells, acts as relevant roles in the lymphocyte development, apoptosis and inflammation and controls the expression of abundant immune-related genes [54]. Several GWAS demonstrated that *ETS1* is associated with RA in Europeans [22], and Asians [7]. Furthermore, Ets-1 is also expressed in pre-osteoblast and osteoblast cells, and studies have revealed that Ets-1 exerts profound effect on osteoblast differentiation and bone development via various mechanisms [55].

### *INPP4B*

The SNP rs17016749 (4q31.21) is located in the intronic region of the *INPP4B* (inositol polyphosphate-4-phosphatase type II B) gene, which encodes the inositol polyphosphate

4-phosphatase type II, one of the enzymes involved in phosphatidylinositol signaling pathways [37]. Ferron et al. revealed that *INPP4B* acts as a major regulator of osteoclast differentiation by modulating calcium signaling and NFATc1 pathway. They also demonstrate that *INPP4B* in humans is a novel determinant of OP susceptibility locus via genetic analysis [56].

In summary, our study demonstrated that there is significant pleiotropy between OP and RA by assessing pleiotropic effects in the framework of a conditional analysis. We identified several novel pleiotropic loci for OP and RA. Our results bring further insight into the common genetic influences of OP and RA. Hence, in order to confirm and explore the generality of the results identified in this study, other ethnic populations and animal or cell experiments are needed in future studies.

## Acknowledgments

All authors were involved in drafting the article or revising it critically for important intellectual content. Study conception, initiation, general design and development and finalization: HW D. Data collection: R Z, XF W, YC C, X L, CP Z and LP P. Drafting manuscript: R Z, HW D, DY L. Revising manuscript content: R Z, DY L, and HW D.

## Author Contributions

**Conceptualization:** Hong-Wen Deng.

**Data curation:** Rou Zhou, Xu Lin, Xia-Fang Wang, Yuan-Cheng Chen, Chun-Ping Zeng, Jun-Min Lu, Zeng-Xing Ao, Lin-Ping Peng, Hong-Wen Deng.

**Formal analysis:** Rou Zhou, Xu Lin, Hong-Wen Deng.

**Funding acquisition:** Hong-Wen Deng.

**Methodology:** Rou Zhou, Xu Lin, Xia-Fang Wang, Jonathan Greenbaum, Yuan-Cheng Chen, Chun-Ping Zeng, Hong-Wen Deng.

**Project administration:** Hong-Wen Deng.

**Resources:** Xiao Chun Bai, Jie Shen.

**Software:** Xu Lin, Jonathan Greenbaum.

**Supervision:** Hong-Wen Deng.

**Validation:** Hong-Wen Deng.

**Writing – original draft:** Rou Zhou, Hong-Wen Deng.

**Writing – review & editing:** Rou Zhou, Ding-You Li, Hong-Wen Deng.

## References

1. Burge R, Dawson-Hughes B, Solomon DH, Wong JB, King A, Tosteson A. Incidence and Economic Burden of Osteoporosis-Related Fractures in the United States, 2005–2025. *J BONE MINER RES.* 2007; 22(3):465–75. <https://doi.org/10.1359/jbmr.061113> PMID: 17144789
2. Liu ZH, Zhao YL, Ding GZ, Zhou Y. Epidemiology of primary osteoporosis in China. *Osteoporos Int.* 1997; 7 Suppl 3:S84–7.
3. Consensus development conference: diagnosis, prophylaxis, and treatment of osteoporosis. *AM J MED.* 1993; 94(6):646–50. PMID: 8506892
4. Ioannidis JP, Ng MY, Sham PC, Zintzaras E, Lewis CM, Deng H, et al. Meta-Analysis of Genome-Wide Scans Provides Evidence for Sex- and Site-Specific Regulation of Bone Mass. *J BONE MINER RES.* 2007; 22(2):173–83. <https://doi.org/10.1359/jbmr.060806> PMID: 17228994

5. Alamanos Y, Drosos AA. Epidemiology of adult rheumatoid arthritis. *AUTOIMMUN REV.* 2005; 4(3):130–6. <https://doi.org/10.1016/j.autrev.2004.09.002> PMID: 15823498
6. Helmick CG, Felson DT, Lawrence RC, Gabriel S, Hirsch R, Kwoh CK, et al. Estimates of the prevalence of arthritis and other rheumatic conditions in the United States: Part I. *Arthritis & Rheumatism.* 2008; 58(1):15–25. <https://doi.org/10.1002/art.23177> PMID: 18163481
7. Chen L, Huang Z, Yang B, Cai B, Su Z, Wang L. Association of E26 Transformation Specific Sequence 1 Variants with Rheumatoid Arthritis in Chinese Han Population. *PLOS ONE.* 2015; 10(8):e134875. <https://doi.org/10.1371/journal.pone.0134875> PMID: 26241881
8. MacGregor AJ, Snieder H, Rigby AS, Koskenvuo M, Kaprio J, Aho K, et al. Characterizing the quantitative genetic contribution to rheumatoid arthritis using data from twins. *Arthritis Rheum.* 2000; 43(1):30–7. [https://doi.org/10.1002/1529-0131\(200001\)43:1<30::AID-ANR5>3.0.CO;2-B](https://doi.org/10.1002/1529-0131(200001)43:1<30::AID-ANR5>3.0.CO;2-B) PMID: 10643697
9. Szekanecz Z EISG. Osteoporosis associated with rheumatoid arthritis. *Ca Bone.* 1998; 1:45–51.
10. Haugeberg G, Uhlig T, Falch JA, Halse JI, Kvien TK. Reduced bone mineral density in male rheumatoid arthritis patients: frequencies and associations with demographic and disease variables in ninety-four patients in the Oslo County Rheumatoid Arthritis Register. *Arthritis Rheum.* 2000; 43(12):2776–84. [https://doi.org/10.1002/1529-0131\(200012\)43:12<2776::AID-ANR18>3.0.CO;2-N](https://doi.org/10.1002/1529-0131(200012)43:12<2776::AID-ANR18>3.0.CO;2-N) PMID: 11145036
11. Haugeberg G, Uhlig T, Falch JA, Halse JI, Kvien TK. Bone mineral density and frequency of osteoporosis in female patients with rheumatoid arthritis: results from 394 patients in the Oslo County Rheumatoid Arthritis register. *Arthritis Rheum.* 2000; 43(3):522–30. [https://doi.org/10.1002/1529-0131\(200003\)43:3<522::AID-ANR7>3.0.CO;2-Y](https://doi.org/10.1002/1529-0131(200003)43:3<522::AID-ANR7>3.0.CO;2-Y) PMID: 10728744
12. Clowes JA, Riggs BL, Khosla S. The role of the immune system in the pathophysiology of osteoporosis. *IMMUNOL REV.* 2005; 208:207–27. <https://doi.org/10.1111/j.0105-2896.2005.00334.x> PMID: 16313351
13. Goertz B, Fassbender WJ, Williams JC, Marzeion AM, Bretzel RG, Stracke H, et al. Vitamin D receptor genotypes are not associated with rheumatoid arthritis or biochemical parameters of bone turnover in German RA patients. *CLIN EXP RHEUMATOL.* 2003; 21(3):333–9. PMID: 12846052
14. Mosaad YM, Hammad EM, Fawzy Z, Abdal Aal IA, Youssef HM, ElSaid TO, et al. Vitamin D receptor gene polymorphism as possible risk factor in rheumatoid arthritis and rheumatoid related osteoporosis. *HUM IMMUNOL.* 2014; 75(5):452–61. <https://doi.org/10.1016/j.humimm.2014.02.009> PMID: 24530824
15. Yoshida S, Ikari K, Furuya T, Toyama Y, Taniguchi A, Yamanaka H, et al. An osteoprotegerin gene polymorphism is associated with an increased risk of hip fracture in Japanese patients with rheumatoid arthritis: results from the IORRA Observational Cohort Study. *PLOS ONE.* 2014; 9(8):e104587. <https://doi.org/10.1371/journal.pone.0104587> PMID: 25105978
16. Chen Y, Yang Y, Liu G. Association Between Osteoprotegerin Gene Polymorphisms and Rheumatoid Arthritis Susceptibility: A Meta-analysis. *ARCH MED RES.* 2016; 47(2):134–41. <https://doi.org/10.1016/j.arcmed.2016.05.001> PMID: 27156396
17. Andreassen OA, Thompson WK, Schork AJ, Ripke S, Mattingsdal M, Kelsøe JR, et al. Improved detection of common variants associated with schizophrenia and bipolar disorder using pleiotropy-informed conditional false discovery rate. *PLOS GENET.* 2013; 9(4):e1003455. <https://doi.org/10.1371/journal.pgen.1003455> PMID: 23637625
18. Andreassen OA, Djurovic S, Thompson WK, Schork AJ, Kendler KS, O'Donovan MC, et al. Improved detection of common variants associated with schizophrenia by leveraging pleiotropy with cardiovascular-disease risk factors. *AM J HUM GENET.* 2013; 92(2):197–209. <https://doi.org/10.1016/j.ajhg.2013.01.001> PMID: 23375658
19. Greenbaum J, Wu K, Zhang L, Shen H, Zhang J, Deng H. Increased detection of genetic loci associated with risk predictors of osteoporotic fracture using a pleiotropic cFDR method. *BONE.* 2017; 99:62–8. <https://doi.org/10.1016/j.bone.2017.03.052> PMID: 28373146
20. Zeng CP, Chen YC, Lin X, Greenbaum J, Chen YP, Peng C, et al. Increased identification of novel variants in type 2 diabetes, birth weight and their pleiotropic loci. *J DIABETES.* 2016. <https://doi.org/10.1111/1753-0407.12510> PMID: 27896934
21. Peng C, Shen J, Lin X, Su KJ, Greenbaum J, Zhu W, et al. Genetic sharing with coronary artery disease identifies potential novel loci for bone mineral density. *BONE.* 2017; 103:70–7. <https://doi.org/10.1016/j.bone.2017.06.016> PMID: 28651948
22. Okada Y, Wu D, Trynka G, Raj T, Terao C, Ikari K, et al. Genetics of rheumatoid arthritis contributes to biology and drug discovery. *NATURE.* 2013; 506(7488):376–81. <https://doi.org/10.1038/nature12873> PMID: 24390342
23. Zheng HF, Forgetta V, Hsu YH, Estrada K, Rosello Diez A, Leo PJ, et al. Whole-genome sequencing identifies EN1 as a determinant of bone density and fracture. *NATURE.* 2015; 526(7571):112–7. <https://doi.org/10.1038/nature14878> PMID: 26367794

24. Purcell S, Neale B, Todd-Brown K, Thomas L, Ferreira MAR, Bender D, et al. PLINK: A Tool Set for Whole-Genome Association and Population-Based Linkage Analyses. *The American Journal of Human Genetics*. 2007; 81(3):559–75. <https://doi.org/10.1086/519795> PMID: 17701901
25. Efron B. Size, power and false discovery rates. *The Annals of Statistics*. 2007; 35(4):1351–77. <https://doi.org/10.1214/009053606000001460>
26. Huang DW, Sherman BT, Lempicki RA. Systematic and integrative analysis of large gene lists using DAVID bioinformatics resources. *NAT PROTOC*. 2009; 4(1):44–57. <https://doi.org/10.1038/nprot.2008.211> PMID: 19131956
27. Roshandel D, Thomson W, Pye SR, Boonen S, Borghs H, Vanderschueren D, et al. Polymorphisms in genes involved in the NF-kappaB signalling pathway are associated with bone mineral density, geometry and turnover in men. *PLOS ONE*. 2011; 6(11):e28031. <https://doi.org/10.1371/journal.pone.0028031> PMID: 22132199
28. Li N, Wang X, Jiang Y, Wang W, Huang W, Zheng X, et al. Association of GALNT3 gene polymorphisms with bone mineral density in Chinese postmenopausal women: the Peking Vertebral Fracture study. *MENOPAUSE*. 2014; 21(5):515–21. <https://doi.org/10.1097/GME.0b013e3182a34981> PMID: 24045674
29. Styrkarsdottir U, Halldorsson BV, Gretarsdottir S, Gudbjartsson DF, Walters GB, Ingvarsson T, et al. Multiple genetic loci for bone mineral density and fractures. *N Engl J Med*. 2008; 358(22):2355–65. <https://doi.org/10.1056/NEJMoa0801197> PMID: 18445777
30. Qin L, Liu Y, Wang Y, Wu G, Chen J, Ye W, et al. Computational Characterization of Osteoporosis Associated SNPs and Genes Identified by Genome-Wide Association Studies. *PLOS ONE*. 2016; 11(3):e150070. <https://doi.org/10.1371/journal.pone.0150070> PMID: 26930606
31. Shiina T, Hosomichi K, Inoko H, Kulski JK. The HLA genomic loci map: expression, interaction, diversity and disease. *J HUM GENET*. 2009; 54(1):15–39. <https://doi.org/10.1038/jhg.2008.5> PMID: 19158813
32. Vignal C, Bansal AT, Balding DJ, Binks MH, Dickson MC, Montgomery DS, et al. Genetic association of the major histocompatibility complex with rheumatoid arthritis implicates two non-DRB1 loci. *Arthritis & Rheumatism*. 2009; 60(1):53–62. <https://doi.org/10.1002/art.24138> PMID: 19116923
33. Styrkarsdottir U, Halldorsson BV, Gretarsdottir S, Gudbjartsson DF, Walters GB, Ingvarsson T, et al. Multiple genetic loci for bone mineral density and fractures. *N Engl J Med*. 2008; 358(22):2355–65. <https://doi.org/10.1056/NEJMoa0801197> PMID: 18445777
34. Liu YZ, Wilson SG, Wang L, Liu XG, Guo YF, Li J, et al. Identification of PLCL1 gene for hip bone size variation in females in a genome-wide association study. *PLOS ONE*. 2008; 3(9):e3160. <https://doi.org/10.1371/journal.pone.0003160> PMID: 18776929
35. Ramos PS, Criswell LA, Moser KL, Comeau ME, Williams AH, Pajewski NM, et al. A comprehensive analysis of shared loci between systemic lupus erythematosus (SLE) and sixteen autoimmune diseases reveals limited genetic overlap. *PLOS GENET*. 2011; 7(12):e1002406. <https://doi.org/10.1371/journal.pgen.1002406> PMID: 22174698
36. Okada Y, Terao C, Ikari K, Kochi Y, Ohmura K, Suzuki A, et al. Meta-analysis identifies nine new loci associated with rheumatoid arthritis in the Japanese population. *NAT GENET*. 2012; 44(5):511–6. <https://doi.org/10.1038/ng.2231> PMID: 22446963
37. Vacher J. Inpp4b is a novel negative modulator of osteoclast differentiation and a prognostic locus for human osteoporosis. *ANN NY ACAD SCI*. 2013; 1280(1):52–4. <https://doi.org/10.1111/nyas.12014> PMID: 23551105
38. Jiang C, Chen H, Shao L, Dong Y. GRM4 gene polymorphism is associated with susceptibility and prognosis of osteosarcoma in a Chinese Han population. *MED ONCOL*. 2014; 31(7). <https://doi.org/10.1007/s12032-014-0050-4> PMID: 24984297
39. Pei Y, Zhang L, Papasian CJ, Wang Y, Deng H. On individual genome-wide association studies and their meta-analysis. *HUM GENET*. 2014; 133(3):265–79. <https://doi.org/10.1007/s00439-013-1366-4> PMID: 24114349
40. Zheng W, Rao S. Knowledge-based analysis of genetic associations of rheumatoid arthritis to inform studies searching for pleiotropic genes: a literature review and network analysis. *ARTHRITIS RES THER*. 2015; 17(1). <https://doi.org/10.1186/s13075-015-0715-1> PMID: 26253105
41. AlFadhli S, Nanda A. Genetic evidence for the involvement of NOTCH4 in rheumatoid arthritis and alopecia areata. *IMMUNOL LETT*. 2013; 150(1–2):130–3. <https://doi.org/10.1016/j.imlet.2013.01.002> PMID: 23318300
42. Kochi Y, Yamada R, Kobayashi K, Takahashi A, Suzuki A, Sekine A, et al. Analysis of single-nucleotide polymorphisms in Japanese rheumatoid arthritis patients shows additional susceptibility markers besides the classic shared epitope susceptibility sequences. *Arthritis & Rheumatism*. 2004; 50(1):63–71. <https://doi.org/10.1002/art.11366> PMID: 14730600

43. Morel J. HLA-DMA\*0103 and HLA-DMB\*0104 alleles as novel prognostic factors in rheumatoid arthritis. *ANN RHEUM DIS*. 2004; 63(12):1581–6. <https://doi.org/10.1136/ard.2003.012294> PMID: 15547082
44. Zhu H, Xia W, Mo X, Lin X, Qiu Y, Yi N, et al. Gene-Based Genome-Wide Association Analysis in European and Asian Populations Identified Novel Genes for Rheumatoid Arthritis. *PLOS ONE*. 2016; 11(11):e167212. <https://doi.org/10.1371/journal.pone.0167212> PMID: 27898717
45. Consortium TMS. Complete sequence and gene map of a human major histocompatibility complex. The MHC sequencing consortium. *NATURE*. 1999; 401(6756):921–3. <https://doi.org/10.1038/44853> PMID: 10553908
46. Boyce BF, Schwarz EM, Xing L. Osteoclast precursors: cytokine-stimulated immunomodulators of inflammatory bone disease. *CURR OPIN RHEUMATOL*. 2006; 18(4):427–32. <https://doi.org/10.1097/O1.bor.0000231913.32364.32> PMID: 16763465
47. Franke A, McGovern DP, Barrett JC, Wang K, Radford-Smith GL, Ahmad T, et al. Genome-wide meta-analysis increases to 71 the number of confirmed Crohn's disease susceptibility loci. *NAT GENET*. 2010; 42(12):1118–25. <https://doi.org/10.1038/ng.717> PMID: 21102463
48. Becker KG, Simon RM, Bailey-Wilson JE, Freidlin B, Biddison WE, McFarland HF, et al. Clustering of non-major histocompatibility complex susceptibility candidate loci in human autoimmune diseases. *Proc Natl Acad Sci U S A*. 1998; 95(17):9979–84. PMID: 9707586
49. Matozaki T, Murata Y, Saito Y, Okazawa H, Ohnishi H. Protein tyrosine phosphatase SHP-2: A proto-oncogene product that promotes Ras activation. *CANCER SCI*. 2009; 100(10):1786–93. <https://doi.org/10.1111/j.1349-7006.2009.01257.x> PMID: 19622105
50. Stanford SM, Maestre MF, Campbell AM, Bartok B, Kiosses WB, Boyle DL, et al. Protein Tyrosine Phosphatase Expression Profile of Rheumatoid Arthritis Fibroblast-like Synoviocytes: A Novel Role of SH2 Domain-Containing Phosphatase 2 as a Modulator of Invasion and Survival. *Arthritis & Rheumatism*. 2013; 65(5):1171–80. <https://doi.org/10.1002/art.37872> PMID: 23335101
51. Zhou Y, Mohan A, Moore DC, Lin L, Zhou FL, Cao J, et al. SHP2 regulates osteoclastogenesis by promoting preosteoclast fusion. *The FASEB Journal*. 2015; 29(5):1635–45. <https://doi.org/10.1096/fj.14-260844> PMID: 25593124
52. Bauler TJ, Kamiya N, Lapinski PE, Langewisch E, Mishina Y, Wilkinson JE, et al. Development of severe skeletal defects in induced SHP-2-deficient adult mice: a model of skeletal malformation in humans with SHP-2 mutations. *DIS MODEL MECH*. 2011; 4(2):228–39. <https://doi.org/10.1242/dmm.006130> PMID: 21068439
53. Kim K, Bang S, Lee H, Cho S, Choi C, Sung Y, et al. High-density genotyping of immune loci in Koreans and Europeans identifies eight new rheumatoid arthritis risk loci. *ANN RHEUM DIS*. 2015; 74(3):e13. <https://doi.org/10.1136/annrheumdis-2013-204749> PMID: 24532676
54. Tsao HW, Tai TS, Tseng W, Chang HH, Grenningloh R, Miaw SC, et al. Ets-1 facilitates nuclear entry of NFAT proteins and their recruitment to the IL-2 promoter. *Proceedings of the National Academy of Sciences*. 2013; 110(39):15776–81. <https://doi.org/10.1073/pnas.1304343110> PMID: 24019486
55. Raouf A, Seth A. Ets transcription factors and targets in osteogenesis. *ONCOGENE*. 2000; 19(55):6455–63. <https://doi.org/10.1038/sj.onc.1204037> PMID: 11175361
56. Ferron M, Boudiffa M, Arsenault M, Rached M, Pata M, Giroux S, et al. Inositol polyphosphate 4-phosphatase B as a regulator of bone mass in mice and humans. *CELL METAB*. 2011; 14(4):466–77. <https://doi.org/10.1016/j.cmet.2011.08.013> PMID: 21982707
